# Supplementary material
Source: PubMed Central journal article supplement (PMC3369610)
Supplement: supp_blood-2012-01-401687_blood-2012-01-401687-1.pdf [file supp_blood-2012-01-401687_blood-2012-01-401687-1.pdf]

## Supplemental information

### Epigenetic Reprogramming Reverses the Relapse Specific Gene Expression Signature and Restores Chemosensitivity in Childhood B-Lymphoblastic Leukemia

Teena Bhatla,<sup>1</sup> Jinhua Wang,<sup>1</sup> Debra J. Morrison,<sup>1</sup> Elizabeth A. Raetz,<sup>1</sup> Michael J. Burke,<sup>2</sup> Patrick Brown<sup>3</sup> and William L. Carroll<sup>1\*</sup>

#### Supplemental Figure legends

##### **Figure S1. Vorinostat is negatively connected with the ALL relapse/diagnosis signature.**

The bar view is constructed from horizontal lines, each representing an individual treatment-control pair (instance). Each of the 12 vorinostat instances in the “bar view” is colored in black, Colors applied on remaining instances reflect the sign of their scores (green, positive; gray, null; red, negative). Similarly 182 instances for trichostatin A are represented in next panel.

##### **Figure S2. In vitro cell viability assays of vorinostat and decitabine individually in combination with chemotherapy**

(A) Reh and (B) RS4: 11 cell lines were incubated with vorinostat and various chemotherapeutic agents were added after a 24 or 48h intervals; etoposide (24 h), prednisolone (24 h), doxorubicin (24 h) and cytarabine (48 h). (C) and (D) shows the effect of decitabine pretreatment for 24 h followed by chemotherapeutic agents in Reh and RS4:11 cell lines respectively.

#### Supplemental Table Legends

**Table S1: List of relapse specific genes analyzed and the effect of vorinostat treatment**

**Table S2: Primers used in various assays**

Figure S1.

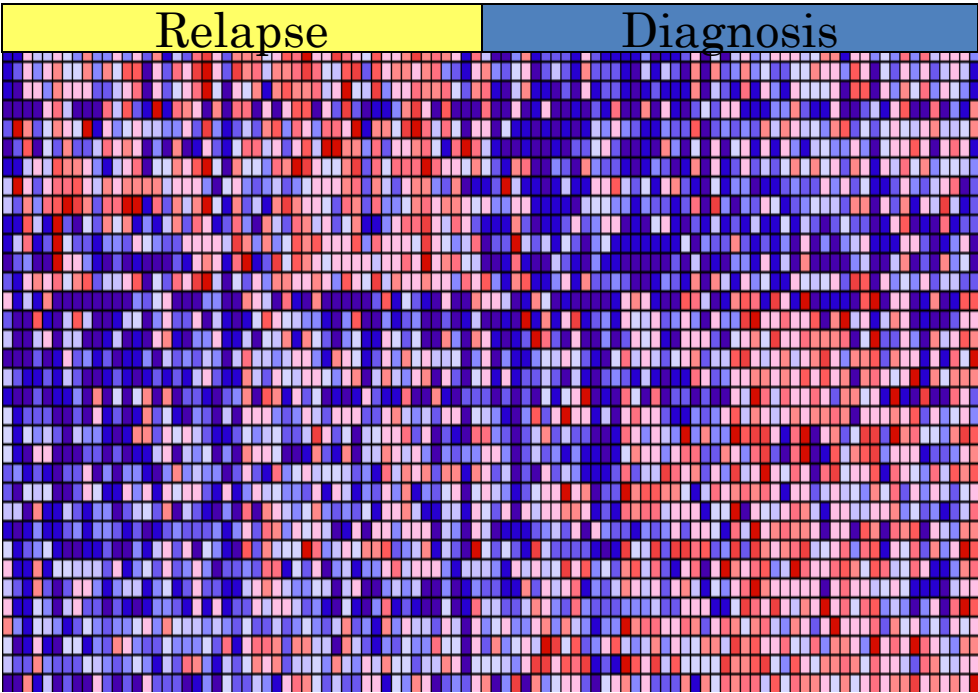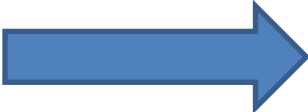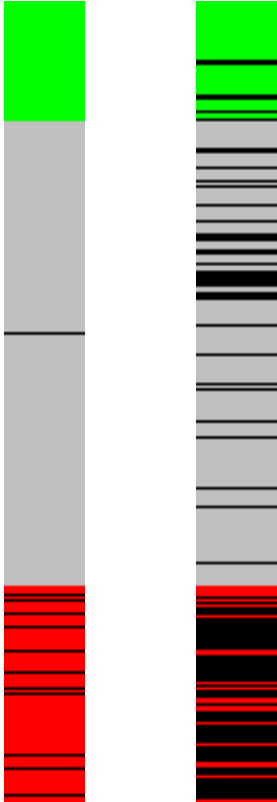

Vorinostat

Trichostatin A

Figure S2

A.

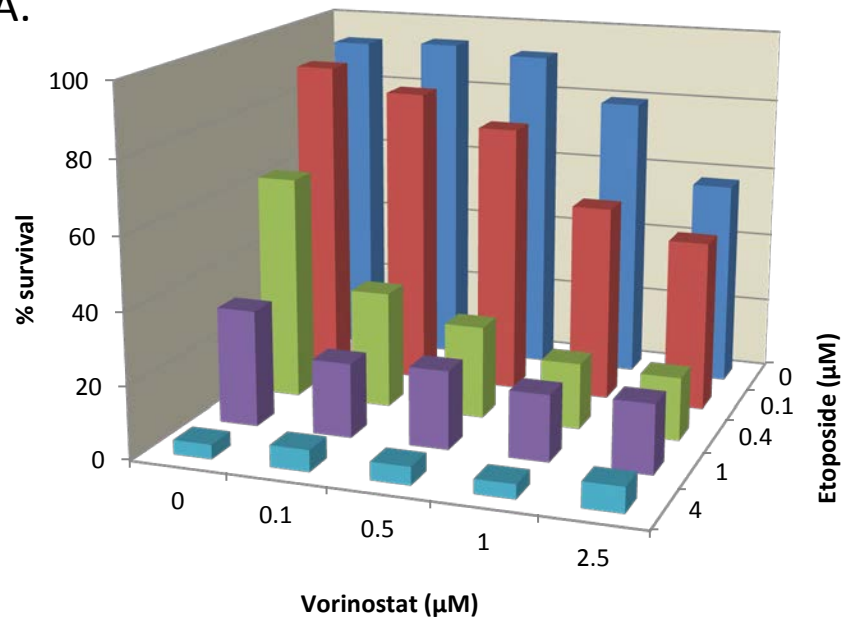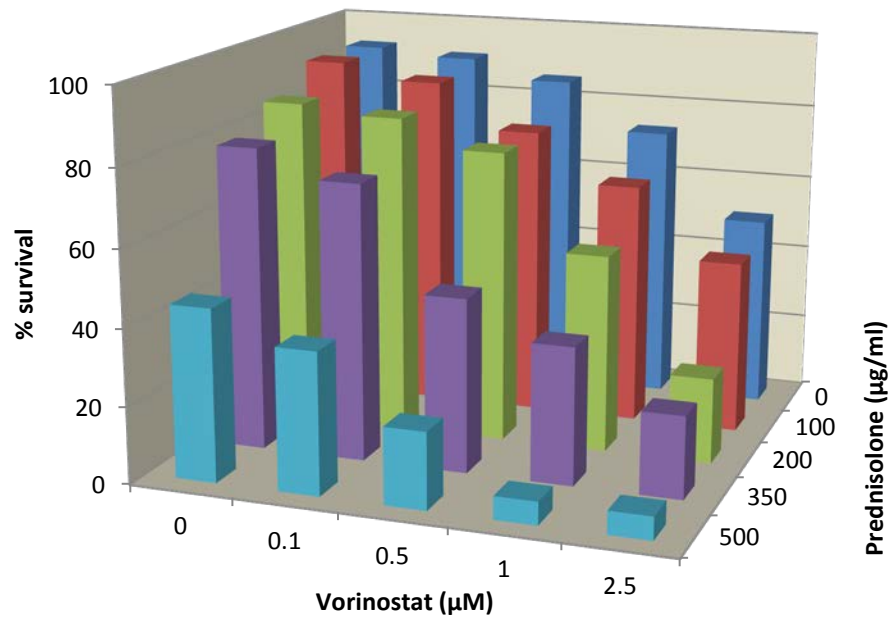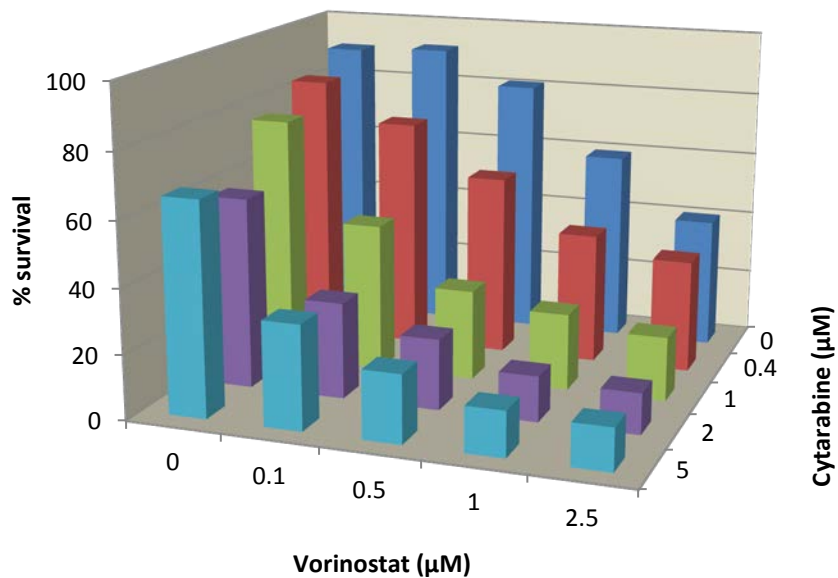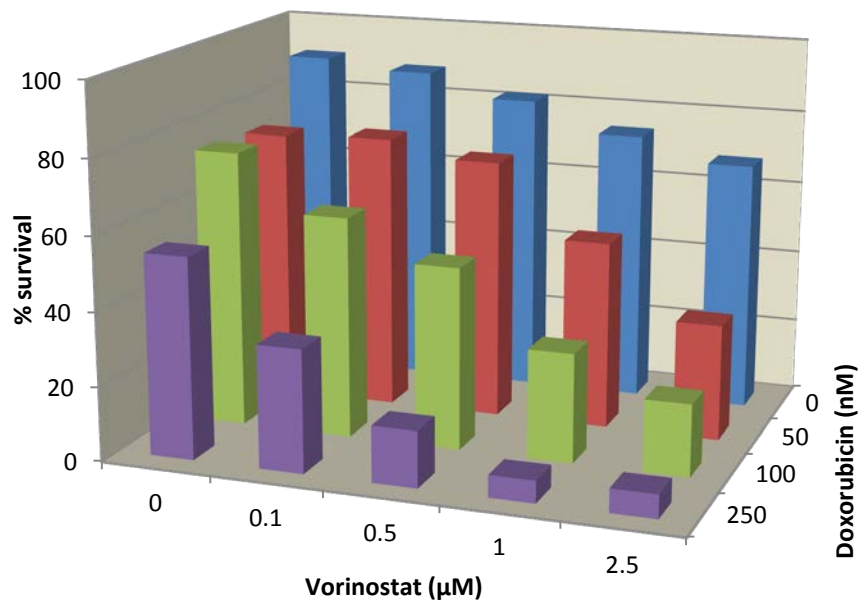

Figure S2

B.

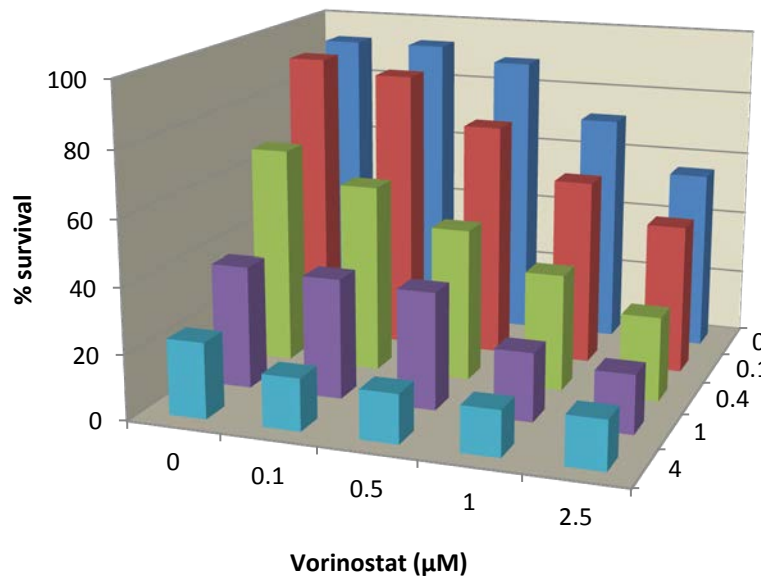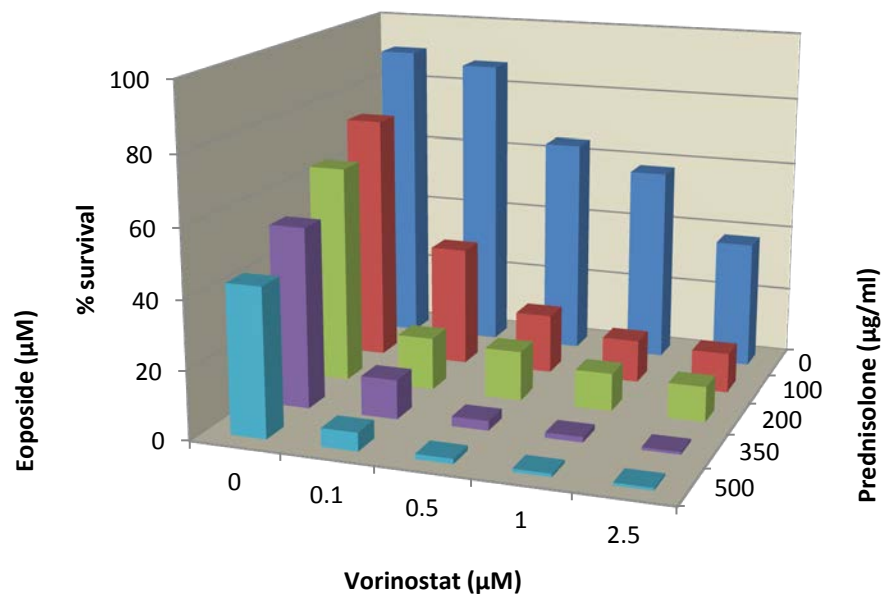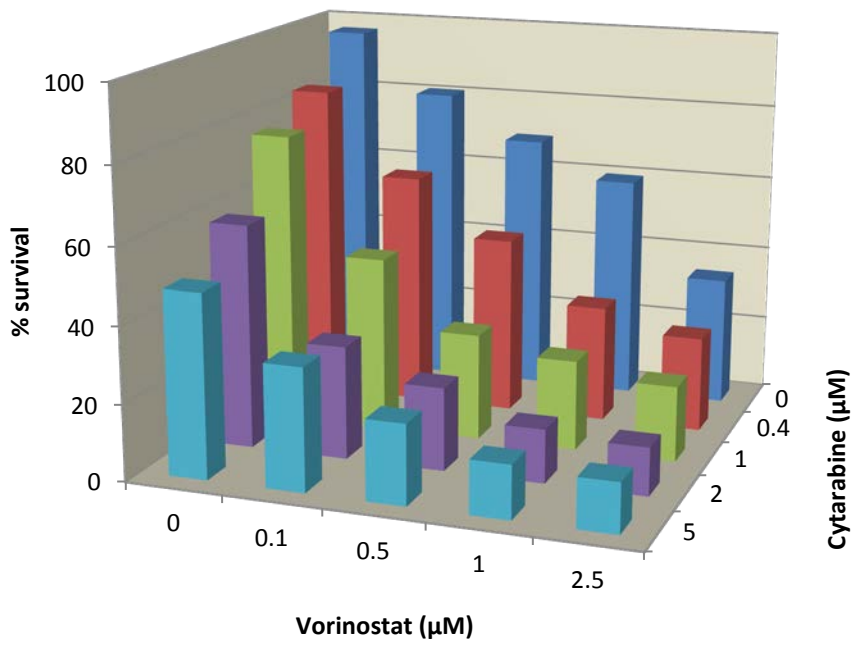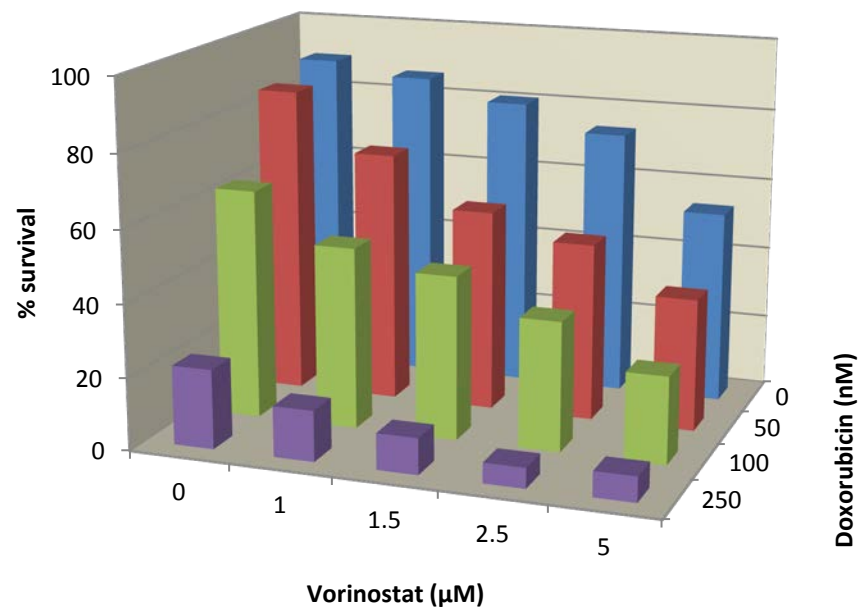

Figure S2

C.

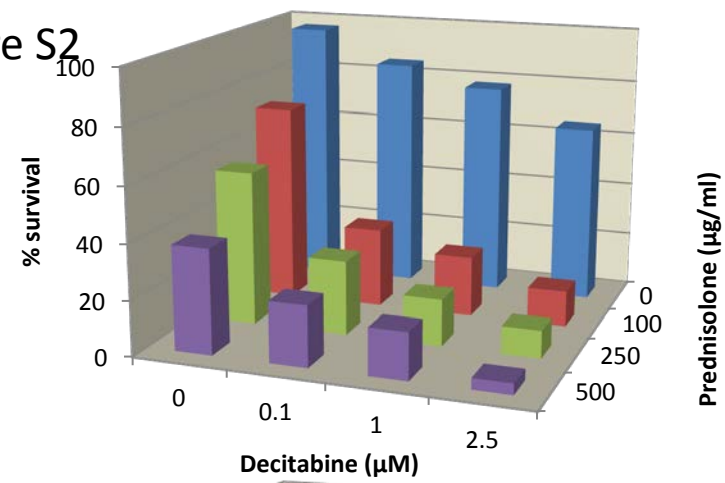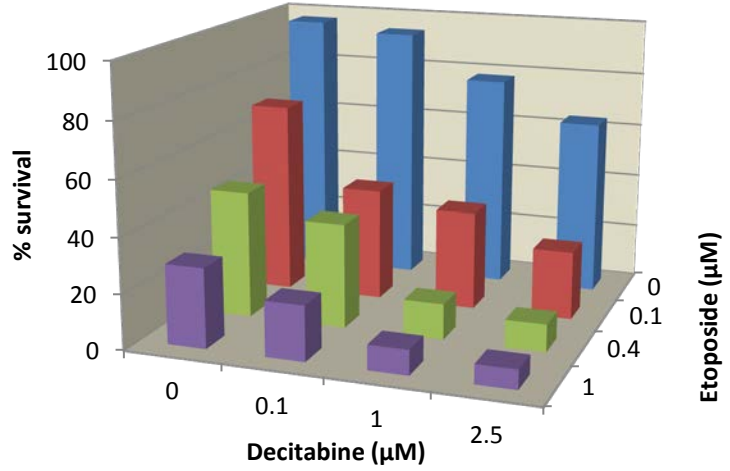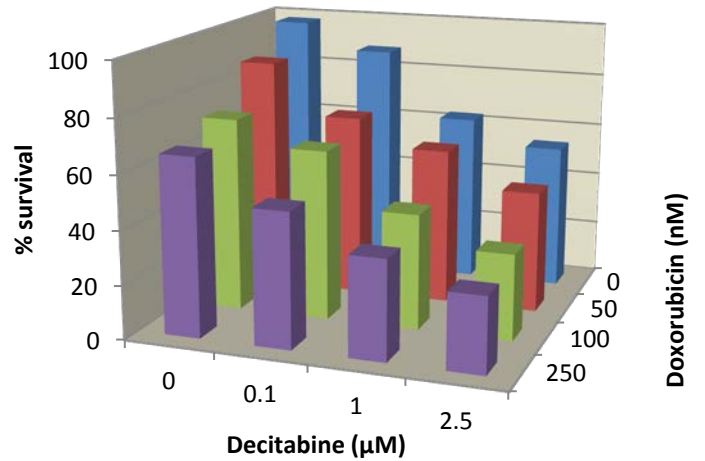

D.

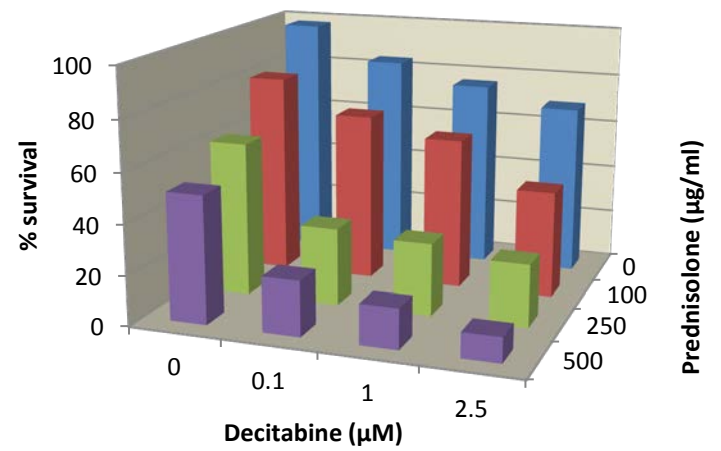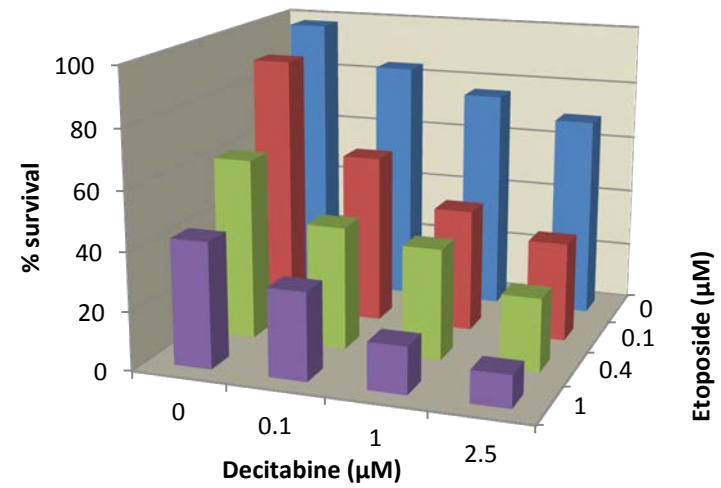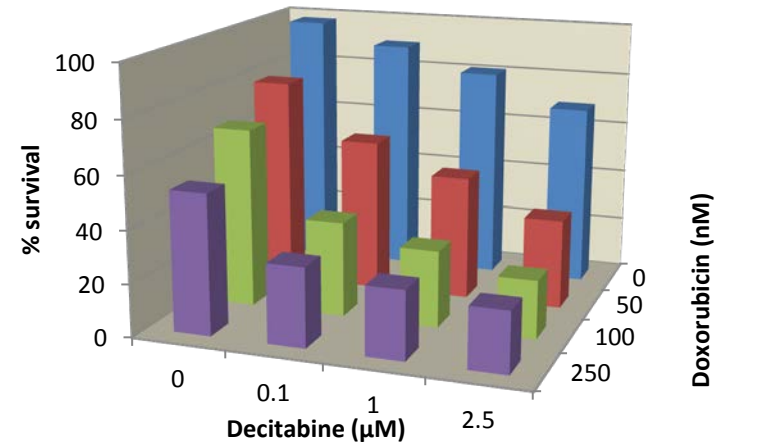

**Table S1: List of relapse specific genes analyzed and the effect of vorinostat treatment**

| <b>Genes*</b> | <b>Up or down regulated in relapse signature compared to diagnosis</b> | <b>Pt 1</b> | <b>Pt 2</b> | <b>Pt 3</b> | <b>Reh</b> | <b>RS4:11</b> | <b>MV4:11</b> |
|---------------|------------------------------------------------------------------------|-------------|-------------|-------------|------------|---------------|---------------|
| BIRC5         | Upregulated                                                            | Y           | Y           | Y           | Y          | Y             | Y             |
| PSAP          | Upregulated                                                            | N           | N           | N           | N          | N             | N             |
| AP2S1         | Upregulated                                                            | N           | Y           | N           | N          | Y             | N             |
| PTBP1         | Upregulated                                                            | Y           | Y           | Y           | N          | Y             | Y             |
| FOXM1         | Upregulated                                                            | Y           | Y           | Y           | Y          | Y             | Y             |
| GTSE1         | Upregulated                                                            | N           | Y           | Y           | N          | N             | Y             |
| TAF13         | Upregulated                                                            | Y           | N           | N           | N          | N             | N             |
| HMGA1         | Upregulated                                                            | N           | Y           | Y           | N          | N             | N             |
| MCM7          | Upregulated                                                            | Y           | Y           | Y           | Y          | Y             | N             |
| KIF2C         | Upregulated                                                            | N           | Y           | Y           | N          | N             | Y             |
| GTSE1         | Upregulated                                                            | N           | Y           | N           | Y          | N             | N             |
| AP2S1         | Upregulated                                                            | N           | N           | N           | N          | Y             | N             |
| TYMS          | Upregulated                                                            | Y           | Y           | Y           | N          | Y             | Y             |
| FANCD2        | Upregulated                                                            | Y           | Y           | Y           | N          | Y             | Y             |
| KIAA0101      | Upregulated                                                            | N           | Y           | Y           | Y          | Y             | N             |
| PTBP1         | Upregulated                                                            | Y           | Y           | Y           | N          | Y             | Y             |
| MRPS18B       | Upregulated                                                            | N           | N           | N           | Y          | Y             | Y             |
| ORC6L         | Upregulated                                                            | N           | Y           | Y           | N          | N             | N             |
| PRR11         | Upregulated                                                            | N           | N           | N           | Y          | N             | N             |
| ATP1A1        | Upregulated                                                            | N           | Y           | Y           | N          | N             | N             |
| CTTN          | Upregulated                                                            | Y           | Y           | NA          | NA         | N             | N             |
| BGN           | Upregulated                                                            | NA          | NA          | NA          | NA         | NA            | NA            |
| SLC9A3R1      | Upregulated                                                            | N           | N           | N           | N          | N             | N             |
| TK1           | Upregulated                                                            | N           | Y           | N           | N          | Y             | N             |
| GAA           | Upregulated                                                            | N           | N           | N           | Y          | Y             | N             |
| SLC37A4       | Upregulated                                                            | N           | N           | N           | N          | Y             | N             |
| AMOTL2        | Upregulated                                                            | NA          | N           | NA          | NA         | NA            | NA            |
| AKR1C1        | Upregulated                                                            | N           | Y           | N           | Y          | N             | N             |
| ESPL1         | Upregulated                                                            | N           | Y           | N           | N          | N             | N             |

| Genes*           | Up or down regulated in relapse signature compared to diagnosis | Pt 1 | Pt 2 | Pt 3 | Reh | RS4:11 | MV4:11 |
|------------------|-----------------------------------------------------------------|------|------|------|-----|--------|--------|
| RELN             | Upregulated                                                     | N    | Y    | N    | NA  | N      | NA     |
| HIST1H4A         | Upregulated                                                     | N    | N    | N    | N   | N      | N      |
| ST7              | Upregulated                                                     | NA   | Y    | Y    | NA  | N      | Y      |
| AP2S1            | Upregulated                                                     | N    | N    | N    | N   | Y      | N      |
| NEF-sp, LOC81691 | Upregulated                                                     | N    | Y    | N    | N   | N      | N      |
| DMC1             | Upregulated                                                     | N    | Y    | N    | Y   | NA     | N      |
| septin 8         | Upregulated                                                     | N    | N    | N    | N   | N      | N      |
| GART             | Upregulated                                                     | Y    | Y    | N    | NA  | N      | N      |
| GRN              | Upregulated                                                     | N    | N    | N    | N   | N      | N      |
| AKR1C2           | Upregulated                                                     | Y    | N    | N    | NA  | N      | N      |
| TMEM97           | Upregulated                                                     | Y    | Y    | N    | N   | Y      | N      |
| C10orf56         | Upregulated                                                     | N    | N    | N    | N   | N      | N      |
| C10orf56         | Upregulated                                                     | N    | N    | N    | N   | N      | N      |
| MSTP9            | Upregulated                                                     | N    | N    | N    | NA  | Y      | Y      |
| OBSL1            | Upregulated                                                     | NA   | NA   | Y    | NA  | NA     | N      |
| MLC1             | Upregulated                                                     | N    | Y    | N    | NA  | N      | N      |
| RECQL4           | Upregulated                                                     | N    | Y    | Y    | N   | Y      | N      |
| LAPTM4B          | Upregulated                                                     | Y    | Y    | NA   | NA  | NA     | NA     |
| PLK3             | Upregulated                                                     | N    | N    | Y    | N   | N      | N      |
| TUBA3D           | Upregulated                                                     | N    | Y    | Y    | N   | N      | N      |
| PNPO             | Upregulated                                                     | N    | N    | N    | N   | N      | N      |
| CENPM            | Upregulated                                                     | N    | Y    | N    | N   | Y      | N      |
| CENTA2           | Upregulated                                                     | Y    | Y    | Y    | Y   | N      | N      |
| PRMT7            | Upregulated                                                     | Y    | N    | Y    | N   | N      | N      |
| POLQ             | Upregulated                                                     | Y    | Y    | N    | Y   | Y      | Y      |
| MEIG1            | Upregulated                                                     | N    | N    | N    | N   | N      | N      |
| ESPL1            | Upregulated                                                     | N    | Y    | N    | N   | N      | N      |
| CD9              | Downregulated                                                   | N    | Y    | N    | Y   | N      | Y      |
| C3orf37          | Downregulated                                                   | Y    | N    | N    | Y   | Y      | Y      |

| <b>Genes*</b> | <b>Up or down regulated in relapse signature compared to diagnosis</b> | <b>Pt 1</b> | <b>Pt 2</b> | <b>Pt 3</b> | <b>Reh</b> | <b>RS4:11</b> | <b>MV4:11</b> |
|---------------|------------------------------------------------------------------------|-------------|-------------|-------------|------------|---------------|---------------|
| NR3C1         | Downregulated                                                          | N           | N           | N           | Y          | Y             | Y             |
| SETX          | Downregulated                                                          | N           | N           | N           | Y          | Y             | N             |
| GABBR1        | Downregulated                                                          | Y           | Y           | Y           | Y          | N             | Y             |
| IFIT5         | Downregulated                                                          | Y           | N           | N           | Y          | N             | Y             |
| IFIT5         | Downregulated                                                          | Y           | N           | N           | Y          | N             | NA            |
| KLF7          | Downregulated                                                          | N           | Y           | N           | Y          | Y             | Y             |
| DOPEY2        | Downregulated                                                          | N           | N           | Y           | Y          | Y             | N             |
| BPG181B       | Downregulated                                                          | Y           | Y           | Y           | Y          | Y             | N             |
| IQCB1         | Downregulated                                                          | N           | N           | N           | Y          | Y             | Y             |
| HRK           | Downregulated                                                          | Y           | Y           | N           | Y          | NA            | Y             |
| ZNF238        | Downregulated                                                          | NA          | NA          | NA          | Y          | NA            | Y             |
| NCOA3         | Downregulated                                                          | Y           | Y           | N           | Y          | Y             | N             |
| MED21         | Downregulated                                                          | N           | N           | N           | N          | N             | N             |
| MED21         | Downregulated                                                          | N           | Y           | N           | N          | N             | N             |
| KIAA0922      | Downregulated                                                          | N           | N           | Y           | Y          | Y             | N             |
| ITSN2         | Downregulated                                                          | N           | N           | N           | Y          | Y             | N             |
| SSBP2         | Downregulated                                                          | Y           | N           | N           | N          | N             | Y             |
| ZMIZ1         | Downregulated                                                          | N           | N           | N           | Y          | Y             | Y             |
| KBTBD2        | Downregulated                                                          | N           | N           | N           | N          | Y             | N             |
| ARID5B        | Downregulated                                                          | Y           | N           | N           | Y          | Y             | N             |
| ZCCHC11       | Downregulated                                                          | N           | N           | N           | Y          | Y             | N             |
| FEM1C         | Downregulated                                                          | N           | N           | N           | Y          | Y             | N             |
| TDRD7         | Downregulated                                                          | Y           | Y           | N           | Y          | Y             | Y             |
| RABEP1        | Downregulated                                                          | Y           | Y           | Y           | Y          | N             | N             |
| YTHDC1        | Downregulated                                                          | N           | Y           | N           | Y          | N             | NA            |
| MACF1         | Downregulated                                                          | N           | N           | N           | Y          | Y             | N             |
| CHD7          | Downregulated                                                          | Y           | Y           | N           | Y          | N             | N             |
| ATF7IP        | Downregulated                                                          | Y           | N           | N           | N          | N             | N             |
| GRAMD1C       | Downregulated                                                          | Y           | Y           | Y           | Y          | Y             | Y             |



| Genes*   | Up or down regulated in relapse signature compared to diagnosis | Pt 1 | Pt 2 | Pt 3 | Reh | RS4:11 | MV4:11 |
|----------|-----------------------------------------------------------------|------|------|------|-----|--------|--------|
| ZNF586   | Downregulated                                                   | N    | N    | N    | N   | N      | N      |
| SMEK2    | Downregulated                                                   | N    | Y    | Y    | Y   | Y      | Y      |
| CCDC88A  | Downregulated                                                   | N    | Y    | N    | N   | Y      | Y      |
| RNFT1    | Downregulated                                                   | N    | N    | N    | Y   | Y      | NA     |
| FLJ11286 | Downregulated                                                   | Y    | N    | N    | N   | N      | Y      |
| POLR2J4  | Downregulated                                                   | N    | N    | Y    | Y   | Y      | Y      |
| AFF1     | Downregulated                                                   | Y    | Y    | N    | Y   | N      | N      |
| GLS      | Downregulated                                                   | N    | N    | N    | Y   | Y      | N      |
| ZEB2     | Downregulated                                                   | Y    | N    | N    | NA  | Y      | N      |
| TOPORS   | Downregulated                                                   | Y    | N    | Y    | Y   | Y      | N      |
| NFYA     | Downregulated                                                   | N    | N    | Y    | N   | N      | N      |
| C7orf23  | Downregulated                                                   | Y    | N    | N    | Y   | N      | N      |
| NF1      | Downregulated                                                   | NA   | NA   | NA   | NA  | NA     | NA     |
| S1PR1    | Downregulated                                                   | Y    | Y    | N    | NA  | NA     | NA     |
| CRIP1    | Downregulated                                                   | N    | Y    | N    | Y   | N      | Y      |
| BCL10    | Downregulated                                                   | N    | Y    | N    | N   | N      | N      |
| CKMT2    | Downregulated                                                   | N    | NA   | NA   | NA  | NA     | NA     |
| KMO      | Downregulated                                                   | N    | N    | N    | NA  | NA     | NA     |
| HERC3    | Downregulated                                                   | N    | Y    | N    | NA  | NA     | NA     |
| SPOCK3   | Downregulated                                                   | NA   | NA   | NA   | NA  | NA     | NA     |
| C6orf32  | Downregulated                                                   | Y    | Y    | N    | NA  | NA     | NA     |
| GAB1     | Downregulated                                                   | Y    | N    | N    | NA  | Y      | NA     |
| RFX3     | Downregulated                                                   | NA   | NA   | NA   | NA  | NA     | NA     |
| CDR1     | Downregulated                                                   | NA   | NA   | NA   | NA  | NA     | NA     |
| DR1      | Downregulated                                                   | N    | Y    | N    | N   | N      | N      |
| TSC1     | Downregulated                                                   | N    | Y    | N    | N   | N      | N      |
| FUSIP1   | Downregulated                                                   | N    | N    | N    | N   | N      | N      |
| BLZF1    | Downregulated                                                   | NA   | NA   | NA   | NA  | NA     | NA     |
| KMO      | Downregulated                                                   | N    | N    | N    | NA  | NA     | NA     |

| <b>Genes*</b> | <b>Up or down regulated in relapse signature compared to diagnosis</b> | <b>Pt 1</b> | <b>Pt 2</b> | <b>Pt 3</b> | <b>Reh</b> | <b>RS4:11</b> | <b>MV4:11</b> |
|---------------|------------------------------------------------------------------------|-------------|-------------|-------------|------------|---------------|---------------|
| RPS27A        | Downregulated                                                          | N           | N           | N           | Y          | N             | N             |
| ITPR1         | Downregulated                                                          | Y           | Y           | N           | N          | Y             | N             |
| GRINL1A       | Downregulated                                                          | N           | N           | N           | N          | N             | N             |
| TUG1          | Downregulated                                                          | N           | N           | Y           | Y          | N             | Y             |
| TTC9          | Downregulated                                                          | NA          | N           | NA          | NA         | N             | NA            |
| KLHL9         | Downregulated                                                          | N           | Y           | NA          | NA         | N             | NA            |
| LBA1          | Downregulated                                                          | N           | N           | N           | NA         | NA            | NA            |
| TMCC1         | Downregulated                                                          | Y           | Y           | N           | N          | N             | N             |
| FUSIP1        | Downregulated                                                          | N           | N           | N           | N          | N             | N             |
| CENTD1        | Downregulated                                                          | Y           | Y           | N           | NA         | NA            | NA            |
| DIS3          | Downregulated                                                          | N           | N           | N           | Y          | Y             | N             |
| SPTBN1        | Downregulated                                                          | NA          | NA          | NA          | NA         | NA            | NA            |
| CCDC88C       | Downregulated                                                          | Y           | Y           | Y           | Y          | Y             | Y             |
| SPTBN1        | Downregulated                                                          | NA          | NA          | NA          | NA         | NA            | NA            |
| ZNF460        | Downregulated                                                          | NA          | NA          | N           | NA         | NA            | NA            |
| SLC25A30      | Downregulated                                                          | NA          | NA          | NA          | NA         | NA            | Y             |
| ITPR1         | Downregulated                                                          | Y           | Y           | N           | N          | Y             | N             |
| WBP11         | Downregulated                                                          | N           | N           | N           | N          | N             | N             |
| AFTPH         | Downregulated                                                          | N           | Y           | N           | Y          | N             | N             |
| RBM7          | Downregulated                                                          | Y           | N           | N           | N          | N             | N             |
| INTS6         | Downregulated                                                          | N           | N           | N           | Y          | Y             | N             |
| ARID1A        | Downregulated                                                          | N           | N           | N           | N          | N             | N             |
| CSGALNACT1    | Downregulated                                                          | Y           | N           | N           | NA         | NA            | Y             |
| SRBD1         | Downregulated                                                          | N           | Y           | N           | NA         | N             | NA            |
| ZBTB10        | Downregulated                                                          | Y           | N           | N           | Y          | Y             | N             |
| B3GNT2        | Downregulated                                                          | Y           | Y           | N           | N          | Y             | N             |
| VCP1P1        | Downregulated                                                          | Y           | N           | N           | N          | N             | N             |
| CHD7          | Downregulated                                                          | NA          | NA          | NA          | NA         | NA            | NA            |
| FCRL2         | Downregulated                                                          | NA          | NA          | NA          | NA         | NA            | NA            |
| TECTA         | Downregulated                                                          | NA          | NA          | NA          | NA         | NA            | NA            |

| <b>Genes*</b>     | <b>Up or down regulated<br/>in relapse signature<br/>compared to diagnosis</b> | <b>Pt 1</b> | <b>Pt 2</b> | <b>Pt 3</b> | <b>Reh</b> | <b>RS4:11</b> | <b>MV4:11</b> |
|-------------------|--------------------------------------------------------------------------------|-------------|-------------|-------------|------------|---------------|---------------|
| EGLN1             | Downregulated                                                                  | N           | N           | N           | Y          | N             | N             |
| RAB9A             | Downregulated                                                                  | Y           | Y           | N           | N          | Y             | N             |
| Transcribed locus | Downregulated                                                                  | NA          | NA          | NA          | NA         | NA            | NA            |
| ALOX5             | Downregulated                                                                  | NA          | N           | Y           | NA         | NA            | NA            |
| CDS2              | Downregulated                                                                  | Y           | N           | N           | N          | N             | N             |
| SFRS10            | Downregulated                                                                  | N           | N           | N           | N          | Y             | N             |
| ABCD4             | Downregulated                                                                  | NA          | N           | N           | NA         | NA            | NA            |
| FRMD4B            | Downregulated                                                                  | Y           | N           | N           | Y          | Y             | NA            |

\* Few genes are represented as multiple probes

Y- Yes, Expression reversed after vorinostat exposure

N- No, Expression not changed after vorinostat exposure

NA- Not analyzed, Genes with expression intensity across the chip < 16

Table S2: Primers used in various assays

### Primers used for qRT-PCR

---

|       |         |                               |
|-------|---------|-------------------------------|
| B2M   | Forward | 5'-ATGTGTCTGGGTTTCATCCATCC-3' |
|       | Reverse | 5'-AGTCACATGGTTCACACGGCA-3'   |
| BIRC5 | Forward | 5'-CATCTCTACATTCAAGAACTGG-3'  |
|       | Reverse | 5'-GGTTAATTCTTCAAACCTGCTTC-3' |
| FOXO1 | Forward | 5'-GGAGGAAATGCCACACTTAGCG-3'  |
|       | Reverse | 5'-TAGGACTTCTGGGTCTTGGGGTG-3' |
| HRK   | Forward | 5'-GTTGGTGAAAACCCTGTGT-3'     |
|       | Reverse | 5'-TAAATAGCATTGGGGTGTCT-3'    |

---

### Primers from Qiagen

---

|        |            |
|--------|------------|
| COL6A2 | QT00067039 |
| CSMD1  | QT00043169 |
| FANCD2 | QT00034370 |
| GATA5  | QT01673777 |
| TYMS   | QT00052423 |
| WT1    | QT00059003 |
| CDKN2A | QT00089964 |
| GATA4  | QT00031997 |
| HOXA9  | QT01002365 |
| NR3C1  | QT00020608 |
| PTPRO  | QT00037695 |
| APC    | QT02407671 |

---

## Primers used for chromatin immunoprecipitation assays

| Genes | Location         |         | Sequence                      |
|-------|------------------|---------|-------------------------------|
| NR3C1 | 1500 bp upstream | Forward | 5'-CCAGATATGCTCCATTTCACTTC-3' |
|       |                  | Reverse | 5'-CTTTTGTGGTAGGAAGCTCAGA-3'  |
| NR3C1 | TSS              | Forward | 5'-TTGAGTAGAGGCGAATCACTTTC-3' |
|       |                  | Reverse | 5'-GTTTCTATTCCTTCCCCACTCAT-3' |
| HRK   | 1500 bp upstream | Forward | 5'-TGTGGTATCCTGCACAGAGG-3'    |
|       |                  | Reverse | 5'-AATGCACCAGCATCTCACTG-3'    |
| BIRC5 | 2000 bp upstream | Forward | 5'-CTTCAACTTACAAACGGTTCAGG-3' |
|       |                  | Reverse | 5'-CTCCTGTTTTCTTTCTCTCTCC-3'  |
| BIRC5 | 5000 bp upstream | Forward | 5'-AACTTATGGGGTTGCTCTCTTTC-3' |
|       |                  | Reverse | 5'-TTTAATAGAGACGGGGTTTCACC-3' |
| FOXM1 | 1500 bp upstream | Forward | 5'-GGCATCAGATCTCACACCAA-3'    |
|       |                  | Reverse | 5'-CACCGTCTCCAAAACAAACA-3'    |
| FOXM1 | TSS              | Forward | 5'-CTGTTCAAAATGCCCAAGT-3'     |
|       |                  | Reverse | 5'-TGCTGTGATGATGCTGTGAA-3'    |

## Primers used for MSP

---

|                     |                      |                                      |
|---------------------|----------------------|--------------------------------------|
| GATA4 <sup>1</sup>  | Unmethylated Forward | 5'-TTTGTATAGTTTTGTAGTTTGTGTTTAGT-3'  |
|                     | Unmethylated Reverse | 5'-CCCAACTCACAACCTCAAATCCCCA-3'      |
|                     | Methylated Forward   | 5'-GTATAGTTTCGTAGTTTGCCTTAGC-3'      |
|                     | Methylated Reverse   | 5'-AACTCGCGACTCGAATCCCCG-3'          |
| APC <sup>1</sup>    | Unmethylated Forward | 5'-GTGTTTTATTGTGGAGTGTGGGT-3'        |
|                     | Unmethylated Reverse | 5'-CCAATCAACAACTCCCAACAA-3'          |
|                     | Methylated Forward   | 5'-TATTGCGGAGTGC GGTC-3'             |
|                     | Methylated Reverse   | 5'-TCGACGAACTCCCGACGA-3'             |
| HOXA9 <sup>2</sup>  | Unmethylated Forward | 5'-GTATGGTTAATGGGGGTGTGGGTTT-3'      |
|                     | Unmethylated Reverse | 5'-CCATACCCAACACCTAACCCACCCAACCCA-3' |
|                     | Methylated Forward   | 5'-GGTTAATGGGGCGCGGGCGTC-3'          |
|                     | Methylated Reverse   | 5'-AACGCCTAACCCGCCGACCCG-3'          |
| NR3C1 <sup>2</sup>  | Unmethylated Forward | 5'-TTGGTTTTGTTTGTGTTTAGGT-3'         |
|                     | Unmethylated Reverse | 5'-CCATCCCAATCCCACTACTTCAAC-3'       |
|                     | Methylated Forward   | 5'-TCGGTTTCGTTTCGTTTAGGTTC-3'        |
|                     | Methylated Reverse   | 5'-CGTCCCGATCCCACTACTTCGAC-3'        |
| CDKN2A <sup>3</sup> | Unmethylated Forward | 5'-TTATTAGAGGGTGGGGTGGATTGT-3'       |
|                     | Unmethylated Reverse | 5'-CAACCCCAAACCACAACCATAA-3'         |
|                     | Methylated Forward   | 5'-TTATTAGAGGGTGGGGCGGATCGC-3'       |
|                     | Methylated Reverse   | 5'-GACCCCGAACCGGACCGTAA-3'           |
| PTPRO <sup>4</sup>  | Unmethylated Forward | 5'-ATGTTTTTGGAGGATTTGGGT-3'          |
|                     | Unmethylated Reverse | 5'-ATACCCCATCACTACACAAACA-3'         |
|                     | Methylated Forward   | 5'-CGTTTTTGGAGGATTTGGGC-3'           |
|                     | Methylated Reverse   | 5'-AAAACACGACTACGCTAACG-3'           |

---

## References

1. Hellebrekers DM, Lentjes MH, van den Bosch SM, et al. GATA4 and GATA5 are potential tumor suppressors and biomarkers in colorectal cancer. *Clinical cancer research : an official journal of the American Association for Cancer Research*. Jun 15 2009;15(12):3990-3997.
2. Wu Q, Lothe RA, Ahlquist T, et al. DNA methylation profiling of ovarian carcinomas and their in vitro models identifies HOXA9, HOXB5, SCGB3A1, and CRABP1 as novel targets. *Mol Cancer*. 2007;6:45.
3. Gutierrez MI, Siraj AK, Bhargava M, et al. Concurrent methylation of multiple genes in childhood ALL: Correlation with phenotype and molecular subgroup. *Leukemia : official journal of the Leukemia Society of America, Leukemia Research Fund, U.K.* Sep 2003;17(9):1845-1850.
4. Motiwala T, Majumder S, Kutay H, et al. Methylation and silencing of protein tyrosine phosphatase receptor type O in chronic lymphocytic leukemia. *Clinical cancer research : an official journal of the American Association for Cancer Research*. Jun 1 2007;13(11):3174-3181.
